# Supplementary material for: Driving Climatic Factors at Critical Plant Developmental Stages for Qinghai–Tibet Plateau Alpine Grassland Productivity
Source: MDPI journal article supplement (doi:10.3390/rs14071564), 2022-03-24
Supplement: s1 [file s1]

**Table S1** Previous studies on the dominant climatic factors of vegetation productivity variations at different time scales on the Qinghai–Tibet Plateau ('-' represents no study results).

| Vegetation Types<br>or Entire Area | Dominant<br>Climatic Factor | Dominant Period       | References               |
|------------------------------------|-----------------------------|-----------------------|--------------------------|
| QTP/TRH                            | Precipitation               | Annual/Growing season | [18,20,95,96,140,141]    |
|                                    | Temperature                 | Annual/Growing season | [17,22,70,92–94,142,143] |
|                                    |                             | Spring                | [23,142,144]             |
|                                    |                             | Summer                | [23,142]                 |
| Meadow                             | Precipitation               | Fall                  | [142]                    |
|                                    |                             | Annual/Growing season | [141,145]                |
|                                    |                             | Spring                | [141]                    |
|                                    |                             | Summer                | [141]                    |
|                                    | Temperature                 | Fall                  | -                        |
|                                    |                             | Annual/Growing season | [19,22,29,142]           |
|                                    |                             | Spring                | [15,19,142]              |
|                                    |                             | Summer                | [22,29,142]              |
| Steppe                             | Precipitation               | Fall                  | [22,142]                 |
|                                    |                             | Annual/Growing season | [19,22,146]              |
|                                    |                             | Spring                | [19,142]                 |
|                                    |                             | Summer                | [15,29]                  |
|                                    | Temperature                 | Fall                  | [15]                     |
|                                    |                             | Annual/Growing season | [22]                     |
|                                    |                             | Spring                | [142]                    |
|                                    |                             | Summer                | [29,142]                 |
| Shrub                              | Precipitation               | Fall                  | [22]                     |
|                                    |                             | -                     | -                        |
|                                    | Temperature                 | Annual/Growing season | [22]                     |
|                                    |                             | Spring                | [22]                     |
|                                    |                             | Summer                | [22]                     |
|                                    |                             | Fall                  | [22]                     |
